## 1 **Use of eVLP-based vaccine candidates to broaden immunity against SARS-CoV-2 variants**

2 Jasminka Bozic<sup>a1</sup>, Tanvir Ahmed<sup>a1</sup>, Barthelemy Ontsouka<sup>a</sup>, Anne-Catherine Fluckiger<sup>b\*</sup>, Abebaw  
3 Diress<sup>a</sup>, Tamara Berthoud<sup>a</sup>, Xiaoyang Yuan<sup>a</sup>, Lanjian Yang<sup>a</sup>, Francisco Diaz-Mitoma<sup>c</sup>, David E.  
4 Anderson<sup>c</sup>, Catalina Soare<sup>a1</sup>

5 <sup>a</sup>VBI Vaccines, 201-310 Hunt Club Road, Ottawa ON K1V 1C1, Canada; <sup>b</sup>Bionaria, 11Bis Rue  
6 de la Garenne, 69290 Saint-Genis-les-Ollières, France; <sup>c</sup>VBI Vaccines, Cambridge, 222  
7 Third Street, Cambridge, 02142 Massachusetts, USA.

8 \*Corresponding author:

9 Email: [afluckiger@vbivaccines.com](mailto:afluckiger@vbivaccines.com) (A.-C. Fluckiger)

10 1: These authors contributed equally to this work.

### 11 **Abstract**

12 Rapid emergence of SARS-CoV-2 variants is a constant threat and a major hurdle to reach herd  
13 immunity. We produced VBI-2905a, an enveloped virus-like particle (eVLP)-based vaccine  
14 candidate expressing prefusion spike protein from the Beta variant that contains several escape  
15 mutations. VBI-2905a protected hamsters against infection with a Beta variant virus and induced  
16 high levels of neutralizing antibodies against Beta RBD. In a heterologous vaccination regimen, a  
17 single injection of VBI-2905a in animals previously immunized with VBI-2902, a vaccine candidate  
18 expressing S from ancestral SARS-CoV-2, hamsters were equally protected against Beta variant  
19 infection. As an alternate strategy to broaden immunity, we produced a trivalent vaccine expressing  
20 the prefusion spike protein from SARS-CoV-2 together with unmodified S from SARS-CoV-1 and  
21 MERS-CoV. Relative to immunity induced against the ancestral strain, the trivalent vaccine VBI-  
22 2901a induced higher and more consistent antibody binding and neutralizing responses against a  
23 panel of variants including Beta, Delta, Kappa, and Lambda, with evidence for broadening of  
24 immunity rather than just boosting cross-reactive antibodies.

## 25 **Keywords**

26 SARS-COV-2 variants; Vaccine; Virus-like-particles; Immunogenicity; cross-neutralizing antibodies

## 27 **Abbreviations**

28 eVLP, enveloped virus-like particules; CoV, coronavirus; VOC, Variant of concern; VOI, varaint of  
29 interest; RBD, receptor binding domain; NTD, N-terminal domain; Ab, antibody; nAb, neutralizing  
30 antibody; MLV, murine leukemia virus; ELISA, enzyme-linked-immuno-sorbent-assay; PRNT,  
31 plaque reduction neutralization test; EPT, end-point titer; Alum, aluminum phosphate; IP,  
32 IntraPeritoneal; IM, IntraMuscular; NRC, National Research Council Canada; VIDO,  
33 Vaccine and Infectious Disease Organization

## 34 **Introduction**

35 The outbreak of a severe respiratory disease in Wuhan, China in December 2019 led to the  
36 identification of a new betacoronavirus related to the severe acute respiratory syndrome (SARS)  
37 coronavirus that was named SARS-CoV-2 (Wu et al., 2020). SARS-CoV-2 rapidly spread  
38 worldwide in a global pandemic in 2019 (COVID-19) and was declared a public health emergency  
39 of international concern (World Health Organization, 2020). Unprecedented effort and innovation in  
40 vaccine development resulted in vaccines, deployed under emergency use authorization, against  
41 SARS-CoV-2 in less than a year (FDA, 2020).

42 Coronaviruses are large single-strand RNA viruses with replication that is error-prone  
43 despite some proofreading mechanisms (Smith and Denison, 2012). Resulting mutational changes  
44 can either be detrimental and lead to viral extinction or confer advantage to the virus and result in  
45 better adaptation to the host. Massive replication of SARS-CoV-2 on a global scale contributes to  
46 increasing numbers of mutations and emergence of variants. Variants of concern (VOC) are  
47 defined by clear evidence indicating a significant impact on transmissibility, severity, and/or  
48 immunity that is likely to have an impact on the disease epidemiology (EDCC, 2021). In July 2021,  
49 four VOC that first emerged as locally dominant variants before spreading globally were discovered  
50 in the U.K. (B.1.1.7 – “Alpha”), South Africa (B.1.351 – “Beta”), Brazil (P1 – “Gamma”), and more

51 recently in India (B.1.617 – “Delta”). In late August the Mu variant first emerged in Columbia,  
52 joining this list of Variants of Interest (VOI) together with Lambda while the incidence of Alpha was  
53 decreasing.

54 The CoV spike (S) protein contains a receptor binding domain (RBD) critical for binding to  
55 and infection of host cells, and is a major target for mutational changes which enhance adaptation  
56 to the host (Berrio et al., 2020; Boni et al., 2020). Each of the VOC are characterized by a number  
57 of shared mutations expressed on S, primarily located in the RBD and N-terminal domain (NTD),  
58 that serve to increase inter-individual transmission, escape neutralizing antibodies acquired by  
59 vaccination or prior natural SARS-CoV-2 infection, or both (Harvey et al., 2021; Zhang et al.,  
60 2020). For instance, the first identified VOC, Alpha, is characterized by a D614G mutation, among  
61 other mutations, that is now fixed in all globally circulating variants of the virus. D614G is  
62 associated with increased transmissibility (Plante et al., 2021; Zhang et al., 2020) but does not  
63 have a major impact on neutralization by serum from either vaccinated or COVID-19 convalescent  
64 individuals. The following VOC that emerged in South Africa was rapidly identified as a vaccine-  
65 escape mutant. This Beta variant bears several mutations in its RBD, including E484K and N501Y,  
66 which significantly inhibit neutralizing activity elicited against the Ancestral Wu-1 strain of virus  
67 whether acquired by vaccination or infection (Tegally et al., 2020; Cele et al., 2021). Emergence of  
68 escape mutants is a major concern because most of the licensed vaccines are based on  
69 expression of various forms of S using the Ancestral sequence of the S protein (Hoffmann et al.,  
70 2021 ; Kyriakidis et al., 2021; Lamb, 2021). More recently, the Delta variant spread from India to  
71 many countries with great speed in spite of significant proportions of fully vaccinated individuals in  
72 many countries. Delta shows the RBD mutation L452R which appeared independently in several  
73 areas of the globe, including in variants Lambda, Kappa, Epsilon, Iota, and contributes to escape  
74 neutralization from Abs induced by previously acquired immunity (Deng et al.2021). Additionally,  
75 mutation P681R in the furin cleavage site of Delta could increase the rate of S1-S2 cleavage,  
76 resulting in better transmissibility (Cherian et al., 2021).

77 Recently, we developed a SARS-CoV-2 candidate vaccine, VBI-2902a, comprised of  
78 enveloped virus-like particles (eVLPs) expressing a modified prefusion form of the ancestral S  
79 sequence, adjuvanted with aluminum phosphate (Alum). We recently demonstrated that VBI-2902a

80 induced strong neutralizing activity in mouse immunogenicity studies, and protected hamsters from  
81 SARS-CoV-2 challenge using a virus related to the ancestral isolate (Fluckiger et al. 2021). Interim  
82 results from a Phase I clinical study in healthy, seronegative individuals (ClinicalTrials.gov  
83 Identifier: NCT04773665) demonstrated robust (4.3-fold greater) neutralizing activity 28 days after  
84 a second, 5µg dose of VBI-2902a, relative to a panel of COVID-19 convalescent sera.

85         Employing the same strategy, we produced a new vaccine candidate, VBI-2905a, that  
86 expresses a modified prefusion S based on the Beta variant sequence. Consistent with previous  
87 studies, VBI-2905a elicited neutralizing antibody responses against the Beta variant which were  
88 significantly greater than those induced by VBI-2902a, and responses against the ancestral strain  
89 which were comparable to VBI-2902a. Consistent with the role of neutralizing antibody responses  
90 as a presumed correlate of protection, greater efficacy was observed in hamsters vaccinated with  
91 VBI-2905a relative to VBI-2902a when challenged with the Beta variant. Noteworthy was the  
92 observation in an alternative vaccination regimen that priming with VBI-2902a followed by a single  
93 booster dose of VBI-2905a induced strong neutralizing antibody responses against the ancestral  
94 strain as well as both Beta and Delta VOC.

95         We also evaluated immunity elicited with a distinct eVLP-based candidate, VBI-2901a,  
96 which expresses a modified prefusion S based on the ancestral sequence in addition to the related  
97 S proteins from SARS CoV-1 and MERS. Immunization with VBI-2901a induced neutralizing  
98 antibody titers against the Beta variant significantly greater than VBI-2902a and comparable to  
99 those induced with VBI-2905a, effectively broadening immunity to VOC not contained within the  
100 vaccine. Antibody binding and neutralizing titers against an extended panel of variants  
101 demonstrated responses typically 3-fold greater than that observed with VBI-2902a. Collectively,  
102 these results demonstrate multiple ways to broaden immunity to SARS-CoV-2 VOC.

## 103 **Material and Methods**

104 *Plasmids, eVLP production, and adjuvant formulation*

105 Expression plasmid for the production of eVLPs expressing SARS-CoV-2 S proteins have been  
106 described previously (Fluckiger et al. 2021). Briefly, the prefusion modified form of S was obtained  
107 by introducing a mutation at the furin cleavage site (RRAR → GSAS) and two Proline at position  
108 K986-V987 of the Wuhan reference and swapping the transmembrane cytoplasmic domain with  
109 that of the VSV-G protein. VBI-2902a was produced using the Wuhan-Hu-1 spike sequence  
110 (Genbank accession number MN908947), and VBI-2905a was produced using the same strategy  
111 with S sequence from Beta variant B.1.351 isolate EPI\_ISL\_911433 (GISAID). Production and  
112 purification of eVLPs were conducted as described elsewhere (Fluckiger et al. 2021). The  
113 preparation of eVLPs expressing either Wuhan reference Spike or Beta variant Spike were  
114 formulated in Aluminum phosphate (Alum, Adjuphos® , Invitrogen) to obtain vaccine candidate  
115 VBI-2902a and VBI-2905a, respectively. To produce VBI-2901, Two additional plasmids were  
116 produced that expressed the optimized sequences for full-length unmodified S protein from SARS-  
117 CoV-1 and MERS-CoV. To produce trivalent eVLPs, HEK-293SF-3F6 were cotransfected with  
118 these 2 plasmids together with the plasmid coding for prefusion ancestral SARS-CoV-2 S used for  
119 VBI-2902a production, and the MLVGAG plasmid as described. Expression of SARS-CoV-2 S,  
120 SARS-CoV-1 S, MERS-CoV S and GAG were determined by Western blot analysis  
121 (Supplementary material Fig.S1).

## 122 *Mouse immunization study*

123 Six- to 8-week-old female C57BL/6 mice were purchased from Charles River (St Constant,  
124 Quebec Canada). The animals were acclimatized for a period of at least 7 days before any  
125 procedures were performed. The animal studies were conducted under ethics protocols approved  
126 by the NRC Animal Care Committee. Mice were maintained in a controlled environment in  
127 accordance with the “Guide for the Care and Use of Laboratory Animals” at the Animal Research  
128 facility of the NRC’s Human Health Therapeutics Research Centre (Montreal). Mice were randomly  
129 assigned to experimental groups of 10 to 15 mice and received intraperitoneal (IP) injections with  
130 0.5 mL of adjuvanted SARS-CoV-2 eVLPs as described elsewhere (Fluckiger, 2021). Blood was

131 collected on day -1 before injection and day 14 after each injection for humoral immunity  
132 assessment at time of euthanasia.

### 133 *Hamster challenge study*

134

135 Syrian golden hamsters (males, 5-6 weeks old) were purchased from Charles River Laboratories  
136 (Saint-Constant, Quebec, Canada). The study was conducted under approval of the CCAC  
137 committee at the Vaccine and Infectious Disease Organization (VIDO) International Vaccine Centre  
138 (Saskatchewan, Canada). Animals were randomly assigned to each experimental group (A, B)  
139 (n=10/group). Animals received 2 intramuscular (IM) injection of either 0.9%-saline buffer (saline  
140 control group) or VBI-2902a (VBI-2902a group), or VBI-2905a (VBI-2905a group), or a first dose of  
141 VBI-2902a followed by a second injection of VBI-2905a (Heterologous boost group). Each dose of  
142 eVLP-based vaccine contained 1µg of Spike protein formulated with 125 µg of Alum. Injection was  
143 performed by intramuscular (IM) route at one side of the thighs in a 100 µL volume. The schedule  
144 for immunization, challenge and sample collection is depicted on Fig. 2a. All animals were  
145 challenged intranasally via both nares with 50 µL/nare containing  $1 \times 10^5$  TCID<sub>50</sub> of hCoV-19/South  
146 Africa/KRISP-EC-K005321/2020 (Seq. available at GISAID: EPI\_ISL\_678470) strain per animal.  
147 Body weights and body temperature were measured at immunization for 3 days and daily from the  
148 challenge day. General health conditions were observed daily through the entire study period.  
149 Blood samples were collected as indicated on Fig. 2a.

### 150 *Antibody binding titers*

151 Anti-SARS-CoV-2 specific IgG binding titers in sera were measured by standard ELISA procedure  
152 described elsewhere (Kirchmeier et al., 2014), using recombinant SARS-CoV-2 S RBD proteins  
153 (Sinobiological). For total IgG binding titers, detection was performed using a goat anti-mouse IgG-  
154 Fc HRP (Bethyl), or Goat anti-Hamster IgG HRP (ThermoFisher), or goat anti-human IgG heavy  
155 and light chain HRP-conjugated (Bethyl). HRP-conjugated Goat anti-mouse IgG1 and HRP-  
156 conjugated goat anti-mouse IgG2b HRP (Bethyl) were used for the detection of isotype subtype.

157 Determination of Ab binding titers to Spike RBDs was performed using SARS-COV-2 RDB  
158 recombinant protein for the specificity of choice as described in Suppl. Table 1. The detection was  
159 completed by adding 3,3',5,5'-tetramethylbenzidine (TMB) substrate solution, and the reaction  
160 stopped by adding liquid stop solution for TMB substrate. Absorbance was read at 450 nm in an  
161 ELISA microwell plate reader. Data fitting and analysis were performed with SoftMaxPro 5, using a  
162 four-parameter fitting algorithm.

### 163 *Virus neutralization assays*

164 Neutralizing activity in mouse serum samples was measured by standard plaque reduction  
165 neutralization test (PRNT) on Vero cells at the NRC using 100 PFU of  
166 SARS-CoV-2/Canada/ON/VIDO-01/2020 (Wu-1 virus) or hCoV-19/South Africa/KRISP-EC-  
167 K005321/2020 (Beta virus). Results were represented as PRNT90 end point titer (EPT),  
168 corresponding to the lowest dilution inhibiting respectively 90% of plaque formation in Vero cell  
169 culture.

170

### 171 *Neutralization assay with pseudoparticles*

172 Production of pseudoparticles (pp) pseudotyped with various spike proteins and neutralization  
173 assay was adapted from Dreux et al, 2009. Expression plasmid were designed using full length S  
174 protein sequences as described previously. Accession number and mutations are listed in Suppl.  
175 Material Table 1. We produced infectious SARS-CoV-2pp carrying a GFP-firefly luciferase double  
176 reporter gene (plasmid pjm155, Garrone et al., 2011) instead of green fluorescent protein (GFP).  
177 Luciferase activity in infected hACE2-HEK293 cells was measured with a Bright-Glo Luciferase  
178 assay system (Promega) and a Beckman Coulter DTX880 plate reader. Data were expressed in  
179 relative luminescence units (RLUs). The percentage of neutralization was calculated by comparing  
180 the luciferase activity in cells infected with SARS-CoV-2pp in the presence of serum from  
181 immunized animals with luciferase activity in cells infected with SARS-CoV-2pp in the absence of  
182 serum.

183 **Statistics**

184 All statistical analyses were performed using GraphPad Prism 9 software (La Jolla, CA). Unless  
185 indicated, multiple comparison was done with Dunn's corrected Kruskal-Wallis test on unpaired  
186 samples and Friedman test on paired samples. The data were considered significant if  $p < 0.05$ .  
187 Geometric mean titers (GMT) with standard deviation are represented on graphs. No samples or  
188 animals were excluded from the analysis. Randomization was performed for the animal studies.

189 **Results**

190

191 **Heterologous boosting with eVLPs bearing S protein from the Beta variant broadens**  
192 **immunity**

193 VBI-2902a is an eVLP-based vaccine candidate that expresses a modified prefusion SARS-CoV-2  
194 S protein from the ancestral Wu-1 strain, adjuvanted with Alum (Fluckiger et al., 2021). VBI-2905a  
195 expresses a modified prefusion SARS-CoV-2 S protein from the Beta variant and is also  
196 adjuvanted with Alum. We immunized mice with 2 injections of VBI-2902a, 2 injections of VBI-  
197 2905a, or a first injection of VBI-2902a followed by a second injection of VBI-2905a (heterologous  
198 boost). As previously described (Fluckiger et al., 2021), 2 doses of VBI-2902a induced high levels  
199 of neutralizing Ab response against the ancestral Wu-1 strain (GMT = 2,458) which were  
200 significantly reduced against the Beta variant (GMT = 94) (Fig.1a-b). By contrast, VBI-2905a  
201 induced Abs that neutralized Beta and ancestral viruses at similar levels in mice, yielding only a  
202 2.2-fold difference with non significant  $p = 0.1484$  (Fig. 1a-b). Sera from mice in the heterologous  
203 boost group cross-neutralized both the Beta variant and the ancestral strain with similar potencies  
204 (1,4 fold difference with  $p = 0.3828$  ). Heterologous boosting with VBI-2905a significantly increased  
205 the PRNT90 against the ancestral strain compared to 2 doses of VBI-2905a alone (from GMT of  
206 371 to 820,  $p = 0.0267$  ) to levels that were closer to those reached after two doses of VBI-2902a



207 ( $p = 0.0131$ ), while PRNT90 GMTs against the Beta variant were comparable to 2 doses of VBI-  
208 2905a (respectively GMT = 564 vs GMT = 619,  $p = 0.8785$ ).

209 Analysis of Ab binding titers to S protein RBDs was consistent with the neutralization data  
210 (Fig.1c). VBI-2902a induced high levels (most of the sera  $>10^6$  EPT with GMT  $974 \times 10^3$ ) of Ab  
211 binding titers against the ancestral S RBD with significantly reduced cross-reactivity against the  
212 Beta variant RBD (GMT  $74 \times 10^3$ ), though there was good cross-reactivity against the Delta variant  
213 RBD (GMT  $616 \times 10^3$ ). Antisera from immunization with VBI-2905a showed similar crossreactivity  
214 against Ancestral, Delta and Beta RBD (respectively GMT  $322 \times 10^3$ ,  $192 \times 10^3$  and  $217 \times 10^3$ ). Animals  
215 receiving the heterologous prime boost regimen had similar reactivity to ancestral and Delta RBD  
216 as compared with the VBI-2902a group, and similar reactivity to Beta RBD compared to the VBI-  
217 2905a group.

## 218 **Heterologous boosting with VBI-2905a protects hamsters against SARS-COV-2 Beta variant**

219 Golden Syrian hamsters were intramuscularly vaccinated 3 weeks apart with two doses of  
220 eVLP vaccine candidates, comprised of: two doses of VBI-2902a (group VBI-2902a), two doses of  
221 VBI-2905a (group VBI-2905a), or a priming dose of VBI-2902a followed by a second, booster dose  
222 of VBI-2905a (group heterologous boost) (Fig. 2a).

223 Neutralizing activities titers against the ancestral virus were comparable across all groups,  
224 including hamsters immunized with 2 doses of the Beta S candidate (VBI-2905a) (Fig.2b).  
225 Neutralization of the Beta variant was lower after immunization with VBI-2902a, with a significant  
226 9.6-fold decrease of Beta nAb compared to homotypic immunization with VBI-2905a (GMT 99 in  
227 VBI-2902a and 1083 in VBI-2905a,  $p = 0,0033$ ). In contrast, nAb titers against Beta RBD were  
228 similar in groups that received either two doses of VBI-2905a or heterologous boosting.

229 Three weeks after the second immunization, hamsters were exposed to  $1 \times 10^5$  TCID50 of  
230 the Beta variant virus in each nare. In the placebo group, hamsters began losing weight the day  
231 after infection which continued until day 6-8. Vaccination with 2 doses of VBI-2902a based on the  
232 ancestral S protein induced limited protection against challenge with moderate weight loss  
233 recorded until day 4, and only a fraction (3/5) of the animals fully regained their initial body weight  
234 after day 7. By contrast, hamsters vaccinated with 2 doses of VBI-2905a exhibited transient weight

235 loss up to day 2-3 and then rapidly regained weight. A similar pattern was observed in hamsters  
236 that received VBI-2905a as a boost. As we have observed in previous hamster challenge studies of  
237 VBI-2902a, there was a correlation between neutralizing antibody titers against the Beta variant  
238 and protection from disease (weight loss) after challenge (data not shown).

### 239 **Immunization with a pan-coronavirus candidate may protect against VOC not contained** 240 **within the vaccine**

241 We hypothesized that exposing the immune system to multiple spike proteins at the same  
242 time might help broaden humoral immunity that could recognize emerging variants or new  
243 coronaviruses more phylogenetically distant to the vaccine candidate. To test this hypothesis we  
244 produced VBI-2901a, a trivalent eVLP vaccine formulated with Alum, that expresses a prefusion  
245 form of the ancestral SARS-CoV-2 S (identical to VBI-2902) with unmodified full length S from  
246 SARS-CoV-1 and MERS-CoV (Suppl. Fig. S1). Mice that received 2 doses of trivalent VBI-2901a  
247 had increased nAb titers (GMT 2915) against the ancestral virus relative to mice that received 2  
248 doses of monovalent VBI-2902a (GMT 831) or VBI-2905a (GMT 448) (Fig. 3a). Moreover, trivalent  
249 VBI-2901a induced neutralization activity against the Beta virus that was equivalent to what was  
250 observed in response to homotypic VBI-2905a, and significantly higher than that observed after  
251 VBI-2902a vaccination (Fig. 3a). Neutralization of both Delta and Kappa variant pseudotyped  
252 particles confirmed broadened neutralizing immunity elicited by VBI-2901a, with titers  
253 approximately 3-fold greater than those induced by VBI-2902a (Fig. 3b). Consistent with the  
254 neutralization activity, VBI-2901a induced higher and/or more consistent levels of Ab binding to the  
255 RBD among all variants evaluated, including Beta, Delta, and Lambda (Fig. 3c).

### 256 **Discussion**

257 Less than a year after identification of the new SARS-CoV-2 virus, variants emerged with  
258 impact on transmissibility, severity and immunity (EDCC, 2021) that challenge the development  
259 and durability of vaccine strategies designed to reach herd immunity. Indeed, all approved  
260 vaccines have been designed against the ancestral SARS-COV-2 virus that is no longer circulating

261 but has been replaced by variants containing mutations which are enabling escape from nAbs  
262 induced against the ancestral strain (Berio et al. 2020; Boni et al, 2020). In the present study, we  
263 compared several strategies to broaden antibody-based immunity which is presumed to be a  
264 correlate of protection against SARS-CoV-2.

265 In addition to our eVLP vaccine expressing the prefusion S from the ancestral SARS-CoV-2  
266 virus, we produced an eVLP-based vaccine expressing the prefusion S from Beta variant. Beta  
267 was chosen for its deleterious mutations E484K and K417N, which enable escape neutralization  
268 from ancestral virus mAbs (Hoffman et al, 2021). We have previously demonstrated that 2 doses  
269 of VBI-2902a protected hamsters against infection by the ancestral Wuhan SARS-CoV-2 virus and  
270 we confirmed here that VBI-2905a also protected hamsters from infection with the SARS-CoV-2  
271 Beta variant. We have also demonstrated that a heterologous boost with Beta variant vaccine VBI-  
272 2905a given to animals that had received a single priming dose of ancestral strain vaccine VBI-  
273 2902a protected against the new Beta variant while also maintaining cross-reactivity against the  
274 ancestral strain. Moreover, heterologous eVLP boosting with VBI-2905a also induced high levels of  
275 antibody reactivity against the globally dominant Delta VOC. Additional challenge studies are in  
276 progress to evaluate if a heterologous boosting strategy can confer protection in Syrian golden  
277 hamsters against infection with the Delta variant.

278 Building upon the flexibility of the eVLP vaccine technology, we produced VBI-2901a, a  
279 multivalent coronavirus candidate containing S proteins from SARS-CoV-2, SARS-CoV, and  
280 MERS-CoV with the intent to broaden immunity to emerging VOC as well as novel, related  
281 betacoronaviruses that may infect humans in the future. Vaccines currently in use or in clinical  
282 evaluation that are based on the ancestral strain induce neutralizing antibody responses that are  
283 less reactive against the Beta VOC, with titers typically 5-10 lower than against the ancestral strain  
284 (Wibmer et al., 2021; Wang et al., 2021). In marked contrast, VBI-2901a elicited robust nAb  
285 responses not only against the ancestral SARS-CoV-2 strain, but also against the Beta variant,  
286 providing evidence of the vaccine candidate's ability to broaden immunity and "anticipate" an  
287 emerging variant not contained within the vaccine. High levels of cross-neutralizing activity elicited  
288 by VBI-2901a were also observed against the Delta and Kappa variants. Other studies have shown  
289 that plasma from individuals previously infected with SARS-CoV-1 who received the BNT162b2

290 mRNA vaccine, which is based on the ancestral SARS-CoV-2 virus, contained a broad spectrum of  
291 neutralizing antibodies against 10 sarbecoviruses tested, including SARS-COV-2 variants, several  
292 strains of SARS-CoV-1, and Bat and Pangolin CoV (Tan et al., 2021). Further studies are  
293 underway to better understand how VBI-2901a, which similarly exposes the B cell repertoire to  
294 spike proteins from both SARS-CoV-1 and SARS-CoV-2, broadens neutralizing activity against  
295 SARS-CoV-2 variants as well as to assess neutralizing responses to phylogenetically more distant  
296 coronaviruses.

297 Broadening of the neutralizing antibody response has also been shown using nanoparticles  
298 of mosaic RBD from various betacoronavirus species (Cohen et al., 2021; Walls et al., 2021).  
299 However, the N terminal domain of the S protein is another important target for neutralizing  
300 antibodies and the site of many mutations that could potentially contribute to antibody  
301 neutralization escape (Andreoni et al. 2021). Given that VBI-2901a expresses the full-length  
302 ectodomain of the Coronaviruses spike, it will be critical to determine the respective roles and  
303 importance of the RBD, NTD, and the highly conserved S2 domains in broadening immunity.

304 Whereas vaccines based on the ancestral strain of SARS-CoV-2 protect against severe  
305 disease caused by variants of concern, variants such as Beta are less sensitive to vaccine-induced  
306 immunity and efficacy rates are accordingly lower. This is likely to become more apparent as  
307 vaccine-induced immunity wanes and as variants continue to emerge with even greater numbers of  
308 mutations. One strategy to address these concerns is to administer booster doses to increase  
309 neutralizing antibody titers against the ancestral strain, a subset of which may cross-neutralize  
310 variants of concern. We have described three alternate strategies that have the potential to  
311 broaden immunity to a greater extent. An eVLP-based candidate based on the Beta variant S  
312 protein, VBI-2905a, induces potent immunity against not just the Beta virus, but also against the  
313 ancestral strain, though it is less potent against the Delta variant. However, building upon immunity  
314 induced against the ancestral strain with a priming dose of VBI-2902a, a single booster dose of  
315 VBI-2905a resulted in potent and more balanced neutralizing antibody responses against the  
316 ancestral virus, and Beta and Delta variants. Finally, we have described a novel trivalent eVLP  
317 candidate, VBI-2901a, which elicited potent and broad immunity against all variants tested,

318 including Beta, Delta, Lambda, and Kappa, with the testing for the potential to neutralize more  
319 distantly related viruses currently underway.

## 320 **Acknowledgment**

321 The authors want to thank Adam Asselin, Matthew Yorke, Teresa Daoud, Rebecca Wang, Gillian  
322 Lampkin (VBI vaccines) for outstanding technical support; NRC Animal Resources Group and the  
323 VIDO Saskatchewan team for remarkable care with animal experiments.

## 324 **Funding**

325 The work performed in this manuscript was supported by the Coalition for Epidemic Preparedness  
326 Innovations (CEPI)

## 327 **References**

- 328 1. Andreano E, Piccini G, Licastro D, Casalino L, Johnson NV, Paciello I, Dal Monego S,  
329 Pantano E, Manganaro N, Manenti A, Manna R, Casa E, Hyseni I, Benincasa L, Montomoli  
330 E, Amaro RE, McLellan JS, Rappuoli R. SARS-CoV-2 escape from a highly neutralizing  
331 COVID-19 convalescent plasma. *Proc Natl Acad Sci U S A*. 2021 Sep  
332 7;118(36):e2103154118. doi: 10.1073/pnas.2103154118. PMID: 34417349.
- 333 2. Berrio A, Gartner V, Wray GA. Positive selection within the genomes of SARS-CoV-2 and  
334 other Coronaviruses independent of impact on protein function. *PeerJ*. 2020 Oct  
335 16;8:e10234. doi: 10.7717/peerj.10234. PMID: 33088633; PMCID: PMC7571416.
- 336 3. Boni MF, Lemey P, Jiang X, Lam TT, Perry BW, Castoe TA, Rambaut A, Robertson DL.  
337 Evolutionary origins of the SARS-CoV-2 sarbecovirus lineage responsible for the COVID-19  
338 pandemic. *Nat Microbiol*. 2020 Nov;5(11):1408-1417. doi: 10.1038/s41564-020-0771-4.  
339 Epub 2020 Jul 28. PMID: 32724171.
- 340 4. Cele S, Gazy I, Jackson L, Hwa SH, Tegally H, Lustig G, Giandhari J, Pillay S, Wilkinson E,  
341 Naidoo Y, Karim F, Ganga Y, Khan K, Bernstein M, Balazs AB, Gosnell BI, Hanekom W,  
342 Moosa MS; Network for Genomic Surveillance in South Africa; COMMIT-KZN Team,

- 343 Lessells RJ, de Oliveira T, Sigal A. Escape of SARS-CoV-2 501Y.V2 from neutralization by  
344 convalescent plasma. *Nature*. 2021 May;593(7857):142-146. doi: 10.1038/s41586-021-  
345 03471-w. Epub 2021 Mar 29. PMID: 33780970.
- 346 5. Cherian S, Potdar V, Jadhav S, Yadav P, Gupta N, Das M, Rakshit P, Singh S, Abraham P,  
347 Panda S, Team N. SARS-CoV-2 Spike Mutations, L452R, T478K, E484Q and P681R, in  
348 the Second Wave of COVID-19 in Maharashtra, India. *Microorganisms*. 2021 Jul  
349 20;9(7):1542. doi: 10.3390/microorganisms9071542. PMID: 34361977; PMCID:  
350 PMC8307577.
- 351 6. Cohen AA, Gnanapragasam PNP, Lee YE, Hoffman PR, Ou S, Kakutani LM, Keeffe JR, Wu  
352 HJ, Howarth M, West AP, Barnes CO, Nussenzweig MC, Bjorkman PJ. Mosaic  
353 nanoparticles elicit cross-reactive immune responses to zoonotic coronaviruses in mice.  
354 *Science*. 2021 Feb 12;371(6530):735-741. doi: 10.1126/science.abf6840. Epub 2021 Jan  
355 12. PMID: 33436524; PMCID: PMC7928838.
- 356 7. Deng X, Garcia-Knight MA, Khalid MM, Servellita V, Wang C, Morris MK, Sotomayor-  
357 González A, Glasner DR, Reyes KR, Gliwa AS, Reddy NP, Sanchez San Martin C,  
358 Federman S, Cheng J, Balcerek J, Taylor J, Streithorst JA, Miller S, Sreekumar B, Chen PY,  
359 Schulze-Gahmen U, Taha TY, Hayashi JM, Simoneau CR, Kumar GR, McMahon S, Lidsky  
360 PV, Xiao Y, Hemarajata P, Green NM, Espinosa A, Kath C, Haw M, Bell J, Hacker JK,  
361 Hanson C, Wadford DA, Anaya C, Ferguson D, Frankino PA, Shivram H, Lareau LF,  
362 Wyman SK, Ott M, Andino R, Chiu CY. Transmission, infectivity, and neutralization of a  
363 spike L452R SARS-CoV-2 variant. *Cell*. 2021 Jun 24;184(13):3426-3437.e8. doi:  
364 10.1016/j.cell.2021.04.025. Epub 2021 Apr 20. PMID: 33991487; PMCID: PMC8057738.
- 365 8. Dreux M, Cosset FL. Detection of neutralizing antibodies with HCV pseudoparticles  
366 (HCVpp). *Methods Mol Biol*. 2009;510:427-38. doi: 10.1007/978-1-59745-394-3\_32. PMID:  
367 19009280.
- 368 9. Fluckiger AC, Ontsouka B, Bozic J, Diress A, Ahmed T, Berthoud T, Tran A, Duque D, Liao  
369 M, McCluskie M, Diaz-Mitoma F, Anderson DE, Soare C. An enveloped virus-like particle  
370 vaccine expressing a stabilized prefusion form of the SARS-CoV-2 spike protein elicits  
371 highly potent immunity. *Vaccine*. 2021 Aug 16;39(35):4988-5001. doi:

- 372 10.1016/j.vaccine.2021.07.034. Epub 2021 Jul 16. PMID: 34304928; PMCID:  
373 PMC8282453.
- 374 10. Garrone P, Fluckiger AC, Mangeot PE, Gauthier E, Dupeyrot-Lacas P, Mancip J, Cangialosi  
375 A, Du Chéné I, LeGrand R, Mangeot I, Lavillette D, Bellier B, Cosset FL, Tangy F,  
376 Klatzmann D, Dalba C. A prime-boost strategy using virus-like particles pseudotyped for  
377 HCV proteins triggers broadly neutralizing antibodies in macaques. *Sci Transl Med*. 2011  
378 Aug 3;3(94):94ra71. doi: 10.1126/scitranslmed.3002330. PMID: 21813755.
- 379 11. Harvey WT, Carabelli AM, Jackson B, Gupta RK, Thomson EC, Harrison EM, Ludden C,  
380 Reeve R, Rambaut A; COVID-19 Genomics UK (COG-UK) Consortium, Peacock SJ,  
381 Robertson DL. SARS-CoV-2 variants, spike mutations and immune escape. *Nat Rev*  
382 *Microbiol*. 2021 Jul;19(7):409-424. doi: 10.1038/s41579-021-00573-0. Epub 2021 Jun 1.  
383 PMID: 34075212; PMCID: PMC8167834.
- 384 12. Hoffmann M, Arora P, Groß R, Seidel A, Hörnich BF, Hahn AS, Krüger N, Graichen L,  
385 Hofmann-Winkler H, Kempf A, Winkler MS, Schulz S, Jäck HM, Jahrsdörfer B,  
386 Schrezenmeier H, Müller M, Kleger A, Münch J, Pöhlmann S. SARS-CoV-2 variants  
387 B.1.351 and P.1 escape from neutralizing antibodies. *Cell*. 2021 Apr 29;184(9):2384-  
388 2393.e12. doi: 10.1016/j.cell.2021.03.036. Epub 2021 Mar 20. PMID: 33794143; PMCID:  
389 PMC7980144.
- 390 13. European Centre for Disease Prevention and Control, SARS-Co-V-2 variants of concern as  
391 of 23 september 2021; <https://www.ecdc.europa.eu/en/covid-19/variants-concern>
- 392 14. U. S. Food & Drug Administration, Decelber 11, 2020 press release  
393 [https://www.fda.gov/news-events/press-announcements/fda-takes-key-action-fight-against-](https://www.fda.gov/news-events/press-announcements/fda-takes-key-action-fight-against-covid-19-issuing-emergency-use-authorization-first-covid-19)  
394 [covid-19-issuing-emergency-use-authorization-first-covid-19](https://www.fda.gov/news-events/press-announcements/fda-takes-key-action-fight-against-covid-19-issuing-emergency-use-authorization-first-covid-19)
- 395 15. World Health Organization, Statement on the second meeting of the International Health  
396 Regulations (2005) Emergency Committee regarding the outbreak of novel coronavirus  
397 (2019-nCoV); [https://www.who.int/news/item/30-01-2020-statement-on-the-second-](https://www.who.int/news/item/30-01-2020-statement-on-the-second-meeting-of-the-international-health-regulations-(2005)-emergency-committee-regarding-the-outbreak-of-novel-coronavirus-(2019-ncov))  
398 [meeting-of-the-international-health-regulations-\(2005\)-emergency-committee-regarding-](https://www.who.int/news/item/30-01-2020-statement-on-the-second-meeting-of-the-international-health-regulations-(2005)-emergency-committee-regarding-the-outbreak-of-novel-coronavirus-(2019-ncov))  
399 [the-outbreak-of-novel-coronavirus-\(2019-ncov\)](https://www.who.int/news/item/30-01-2020-statement-on-the-second-meeting-of-the-international-health-regulations-(2005)-emergency-committee-regarding-the-outbreak-of-novel-coronavirus-(2019-ncov))

- 400 16. Kirchmeier M, Fluckiger AC, Soare C, Bozic J, Ontsouka B, Ahmed T, Diress A, Pereira L,  
401 Schödel F, Plotkin S, Dalba C, Klatzmann D, Anderson DE. Enveloped virus-like particle  
402 expression of human cytomegalovirus glycoprotein B antigen induces antibodies with  
403 potent and broad neutralizing activity. *Clin Vaccine Immunol*. 2014 Feb;21(2):174-80. doi:  
404 10.1128/CVI.00662-13. Epub 2013 Dec 11. PMID: 24334684; PMCID: PMC3910943.
- 405 17. Kyriakidis NC, López-Cortés A, González EV, Grimaldos AB, Prado EO. SARS-CoV-2  
406 vaccines strategies: a comprehensive review of phase 3 candidates. *NPJ Vaccines*. 2021  
407 Feb 22;6(1):28. doi: 10.1038/s41541-021-00292-w. PMID: 33619260; PMCID:  
408 PMC7900244.
- 409 18. Lamb YN. BNT162b2 mRNA COVID-19 Vaccine: First Approval. *Drugs*. 2021  
410 Mar;81(4):495-501. doi: 10.1007/s40265-021-01480-7. PMID: 33683637; PMCID:  
411 PMC7938284.
- 412 19. Plante JA, Liu Y, Liu J, Xia H, Johnson BA, Lokugamage KG, Zhang X, Muruato AE, Zou J,  
413 Fontes-Garfias CR, Mirchandani D, Scharton D, Bilello JP, Ku Z, An Z, Kalveram B,  
414 Freiberg AN, Menachery VD, Xie X, Plante KS, Weaver SC, Shi PY. Spike mutation D614G  
415 alters SARS-CoV-2 fitness. *Nature*. 2021 Apr;592(7852):116-121. doi: 10.1038/s41586-020-  
416 2895-3. Epub 2020 Oct 26. Erratum in: *Nature*. 2021 Jul;595(7865):E1. PMID: 33106671;  
417 PMCID: PMC8158177.
- 418 20. Smith EC, Denison MR. Implications of altered replication fidelity on the evolution and  
419 pathogenesis of coronaviruses. *Curr Opin Virol*. 2012 Oct;2(5):519-24. doi:  
420 10.1016/j.coviro.2012.07.005. Epub 2012 Aug 1. PMID: 22857992; PMCID: PMC7102773.
- 421 21. Tegally H, Wilkinson E, Giovanetti M, Iranzadeh A, Fonseca V, Giandhari J, Doolabh D,  
422 Pillay S, San EJ, Msomi N, Mlisana K, von Gottberg A, Walaza S, Allam M, Ismail A,  
423 Mohale T, Glass AJ, Engelbrecht S, Van Zyl G, Preiser W, Petruccione F, Sigal A, Hardie D,  
424 Marais G, Hsiao NY, Korsman S, Davies MA, Tyers L, Mudau I, York D, Maslo C, Goedhals  
425 D, Abrahams S, Laguda-Akingba O, Alisoltani-Dehkordi A, Godzik A, Wibmer CK, Sewell  
426 BT, Lourenço J, Alcantara LCJ, Kosakovsky Pond SL, Weaver S, Martin D, Lessells RJ,  
427 Bhiman JN, Williamson C, de Oliveira T. Detection of a SARS-CoV-2 variant of concern in



- 428 South Africa. *Nature*. 2021 Apr;592(7854):438-443. doi: 10.1038/s41586-021-03402-9.  
429 Epub 2021 Mar 9. PMID: 33690265.
- 430 22. Wang R, Chen J, Gao K, Wei GW. Vaccine-escape and fast-growing mutations in the  
431 United Kingdom, the United States, Singapore, Spain, India, and other COVID-19-  
432 devastated countries. *Genomics*. 2021 Jul;113(4):2158-2170. doi:  
433 10.1016/j.ygeno.2021.05.006. Epub 2021 May 15. PMID: 34004284; PMCID:  
434 PMC8123493.
- 435 23. Wibmer CK, Ayres F, Hermanus T, Madzivhandila M, Kgagudi P, Oosthuysen B, Lambson  
436 BE, de Oliveira T, Vermeulen M, van der Berg K, Rossouw T, Boswell M, Ueckermann V,  
437 Meiring S, von Gottberg A, Cohen C, Morris L, Bhiman JN, Moore PL. SARS-CoV-2  
438 501Y.V2 escapes neutralization by South African COVID-19 donor plasma. *Nat Med*. 2021  
439 Apr;27(4):622-625. doi: 10.1038/s41591-021-01285-x. Epub 2021 Mar 2. PMID: 33654292.
- 440 24. Wu F, Zhao S, Yu B, Chen YM, Wang W, Song ZG, Hu Y, Tao ZW, Tian JH, Pei YY, Yuan  
441 ML, Zhang YL, Dai FH, Liu Y, Wang QM, Zheng JJ, Xu L, Holmes EC, Zhang YZ. A new  
442 coronavirus associated with human respiratory disease in China. *Nature*. 2020  
443 Mar;579(7798):265-269. doi: 10.1038/s41586-020-2008-3. Epub 2020 Feb 3. Erratum in:  
444 *Nature*. 2020 Apr;580(7803):E7. PMID: 32015508; PMCID: PMC7094943.
- 445 25. Zhang L, Jackson CB, Mou H, Ojha A, Peng H, Quinlan BD, Rangarajan ES, Pan A,  
446 Vanderheiden A, Suthar MS, Li W, Izzard T, Rader C, Farzan M, Choe H. SARS-CoV-2  
447 spike-protein D614G mutation increases virion spike density and infectivity. *Nat Commun*.  
448 2020 Nov 26;11(1):6013. doi: 10.1038/s41467-020-19808-4. PMID: 33243994; PMCID:  
449 PMC7693302.

## 450 **Legend to figures**

451 **Figure 1: Immunogenicity of VBI-2902a and VBI-2905a in mice.** C57BL/6 mice, 8 per group,  
452 received 2 IP injections 3 weeks apart, of VBI-2902a or VBI-2905a or a first injection of VBI-2902a  
453 followed by a second injection of VBI-2905a (Heterologous boost), each containing 0.1 µg of S.  
454 Blood was collected at day 14 after the second injection for monitoring of the humoral response.

455 **(a)** Sera from each group were analyzed in PRNT assay with a 90% threshold (PRNT90) using  
456 Wu-1 virus and Beta virus as described in Material and Methods. GMT and results from two-tailed  
457 Mann–Whitney U-test are indicated. **(b)** Change in neutralization between Wu-1 and Beta viruses.  
458 Fold change was calculated for each serum as the ratio between reactivity to Ancestral and Beta  
459 RBD, Fold change in each group is indicated as the geometric mean preceded by an arrow.  
460 Statistical analysis was determined using two tailed Wilcoxon test. **(c)** Ab binding titers were  
461 evaluated by ELISA using recombinant Delta RBD as described in Material and Methods.  
462 Statistical significance was determined by Kruskal-Wallis test.

463 **Figure 2: Beta variant challenge in Syrian golden hamsters after immunization with VBI-**  
464 **2902a and VBI-2905a. (a)** Schematic representation of the challenge experiments. Four groups of  
465 10 Syrian gold hamsters received 2 IM injections 3 weeks apart , of placebo saline buffer or VBI-  
466 2902a or VBI-2905a or a first injection of VBI-2902a followed by a second injection of VBI-2905a,  
467 with 1µg of S per dose. Animals in Placebo groups received Saline buffer. Blood was collected 2  
468 weeks after each injection. Three weeks after the last injection (day 42) hamsters were exposed to  
469 SARS-CoV-2 Beta virus at  $1 \times 10^5$  TCID<sub>50</sub> per animal via both nares. At 3 days post infection (dpi),  
470 5 animals per groups were sacrificed for viral load analysis. The remaining animals were clinically  
471 evaluated daily until end of study at 14dpi. **(b)** Neutralization activity was measured by PRNT90 in  
472 immunized groups; results are represented as PRNT90 EPT. GMT and statistical significance from  
473 two tailed Friedman test are indicated **(c)** Hamsters were monitored daily for weight change.  
474 Results are represented for each animal in each groups as kinetic of weight change from day 0 to  
475 day 14 after infection. One animal from VBI-2905a group was sacrificed at day 7 because of  
476 worsening of clinical presentation after a fight in the cage. Significant days of weight loss relative to  
477 Saline group ( $p < 0.005$ ) are indicated. Statistical analysis was performed with unpaired non  
478 parametric multiple t test using Holm-Šidák method.

479 **Figure 3: Immunogenicity of trivalent VBI-2901a.** Three groups of 10 mice were immunized with  
480 2 doses of VBI-2901a (01a) or VBI-2902a (02a) or VBI-2905a (05a) 3 weeks apart. Blood was  
481 collected at day 14 after the last injection for monitoring of the humoral response. **(a)** Neutralization

482 EPT measured by PRNT90 against Wu-1 virus and Beta variant. GMT are indicated above each  
483 group. **(b)** Neutralization of pseudoparticles expressing S from Wu-1 virus, or Delta or Kappa  
484 variants are represented as half-maximum inhibitory dilutions (Neutralization ID50). Geometric  
485 means are indicated above each panel. Due to technical limitations, only 8 sera per groups were  
486 tested against Wu-1 and Kappa pseudoparticles and 4 sera against Delta pseudoparticles. Sera  
487 were randomly picked. **(c)** Ab binding titers measured in ELISA against recombinant RBD from Wu-  
488 1 ancestral virus, or Beta, Delta, and Kappa variants.

|

489 | FIGURE 1

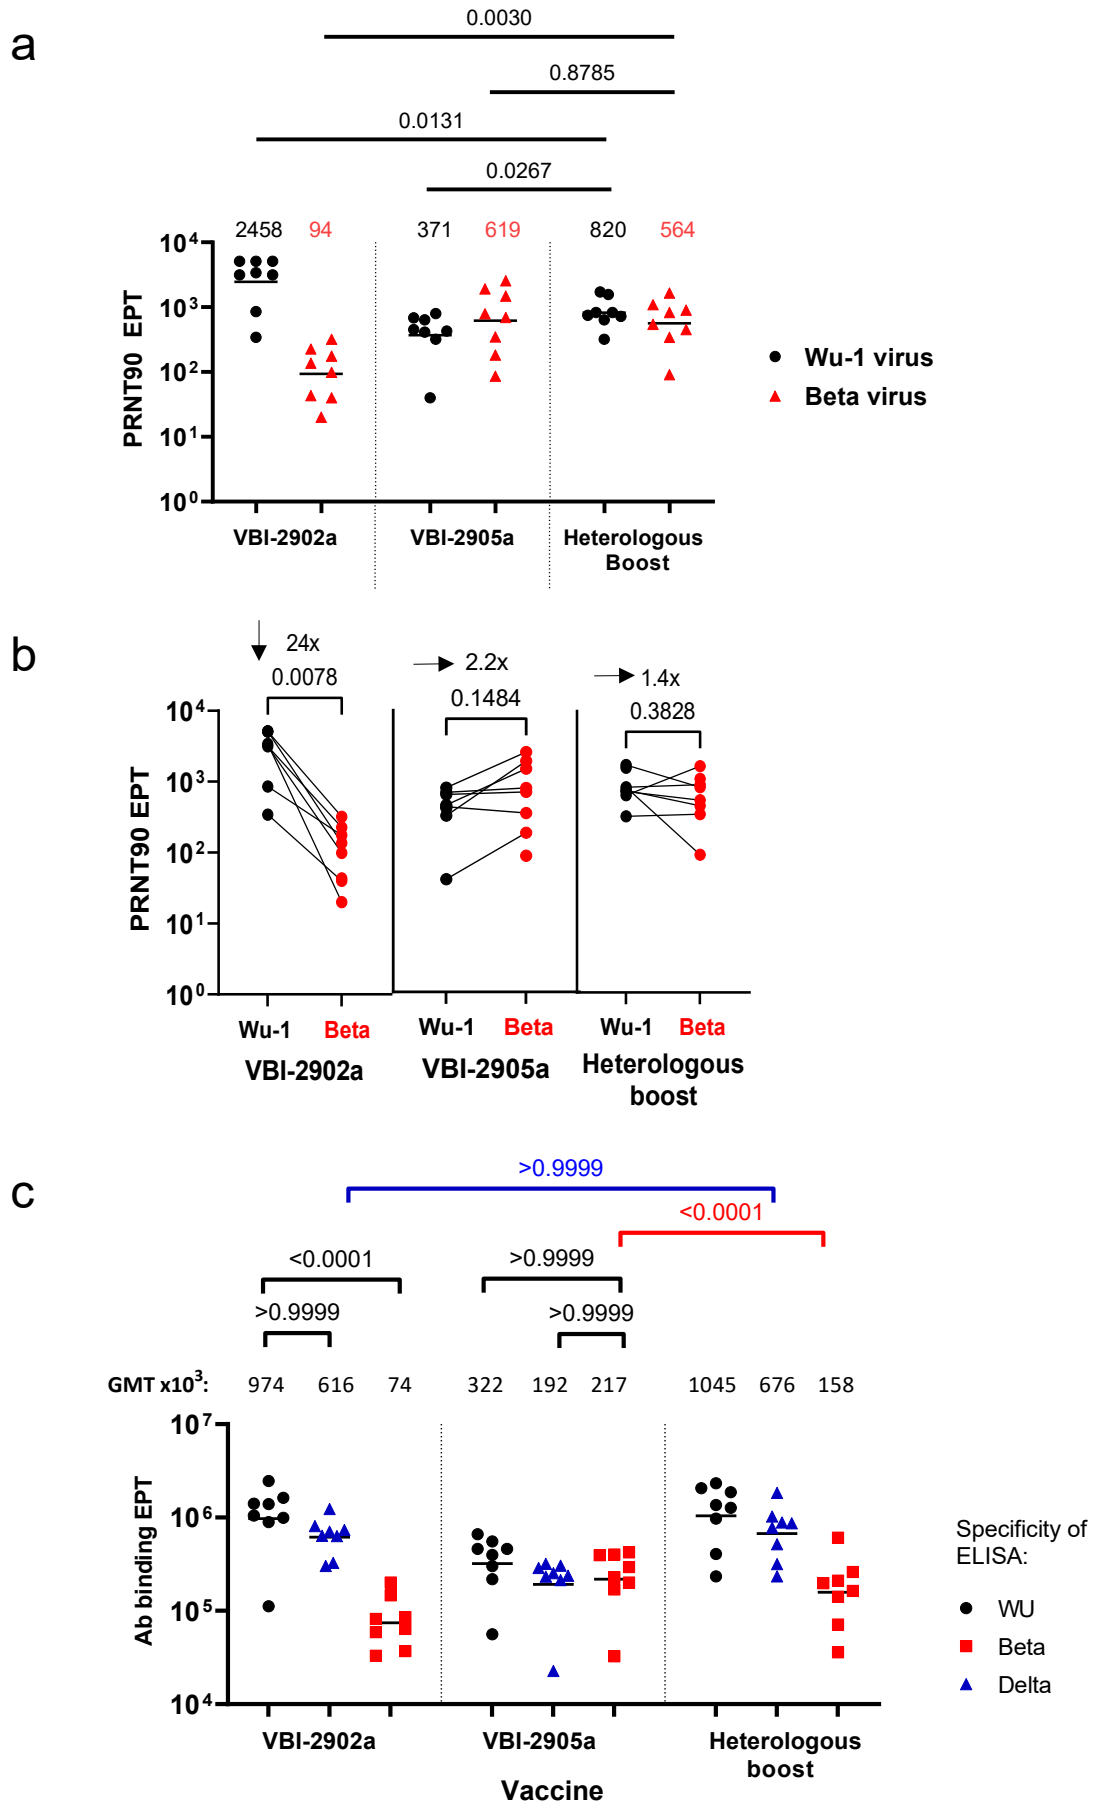

490 FIGURE 2

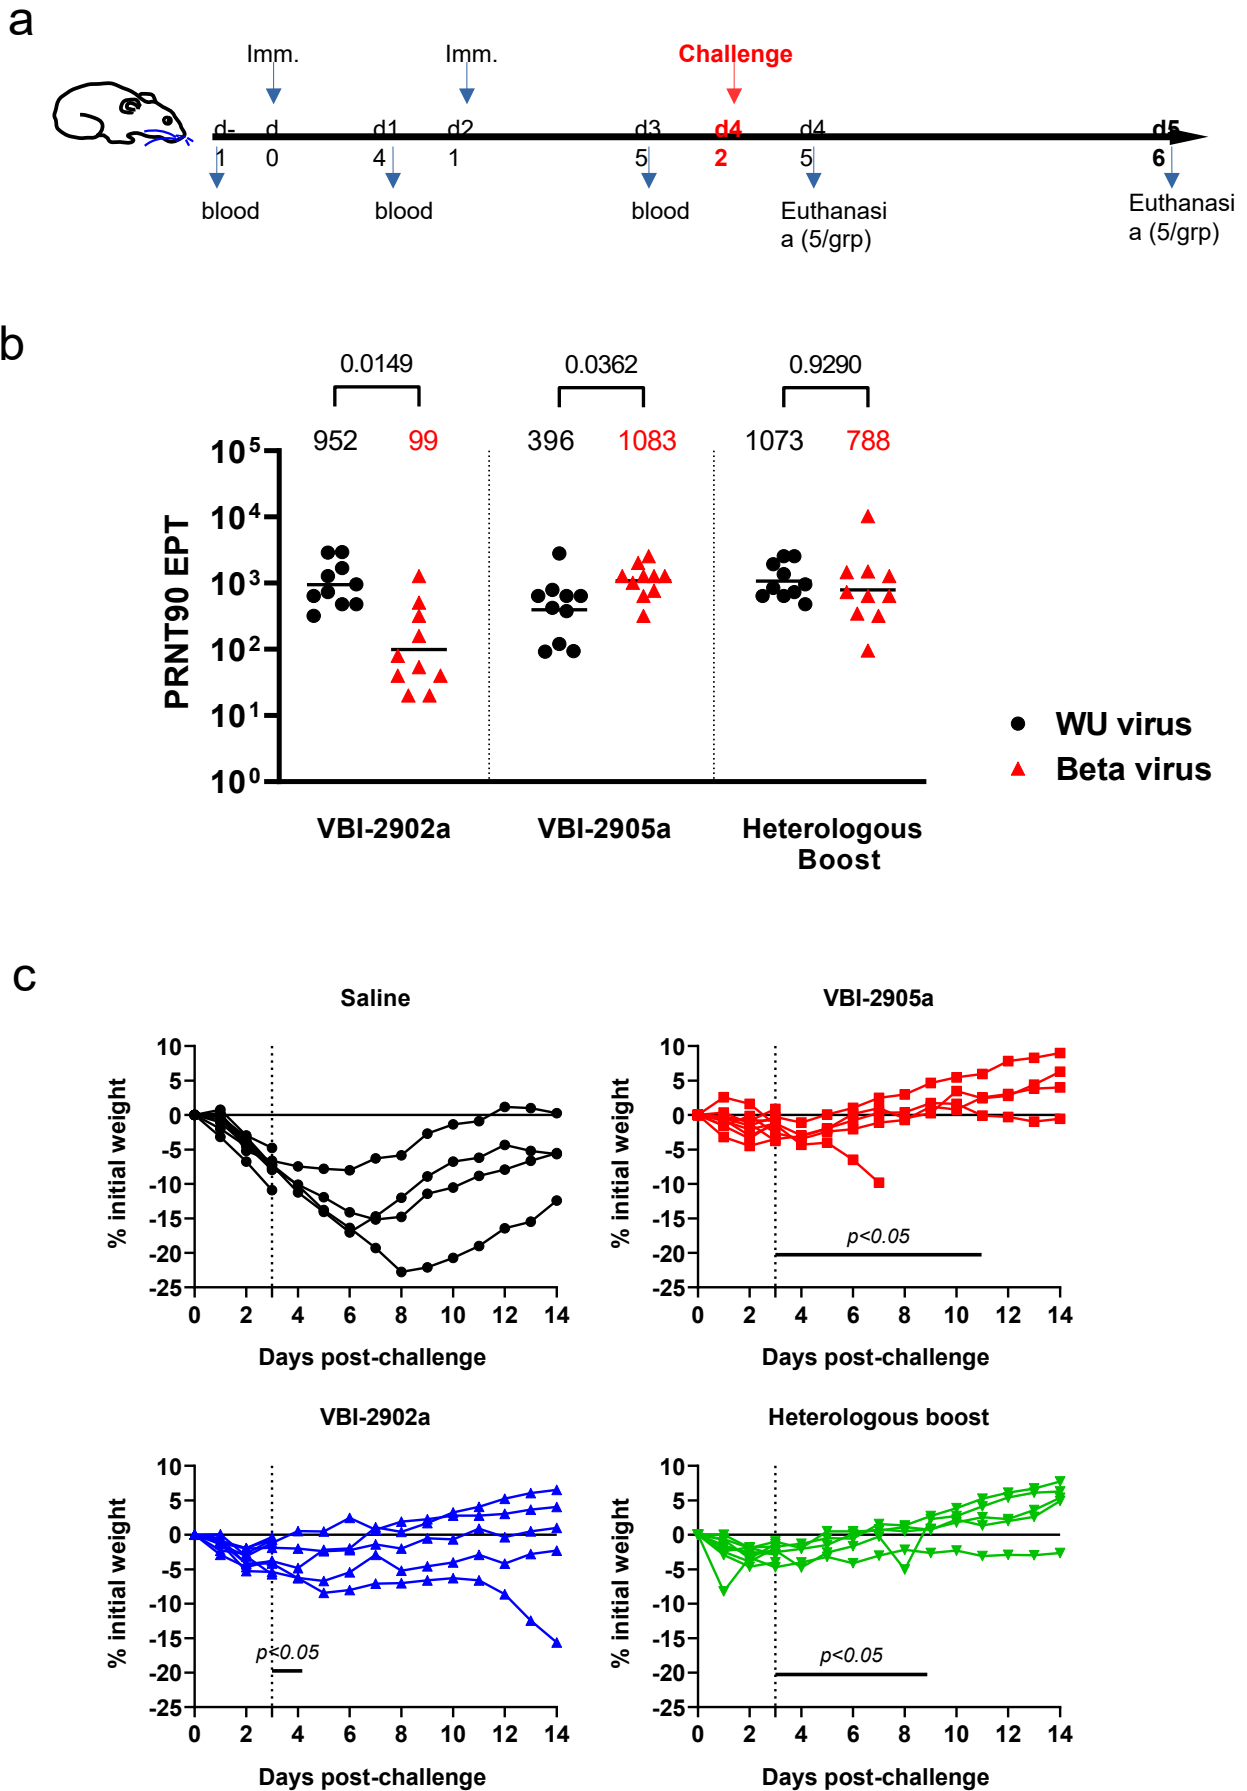

491 | FIGURE 3

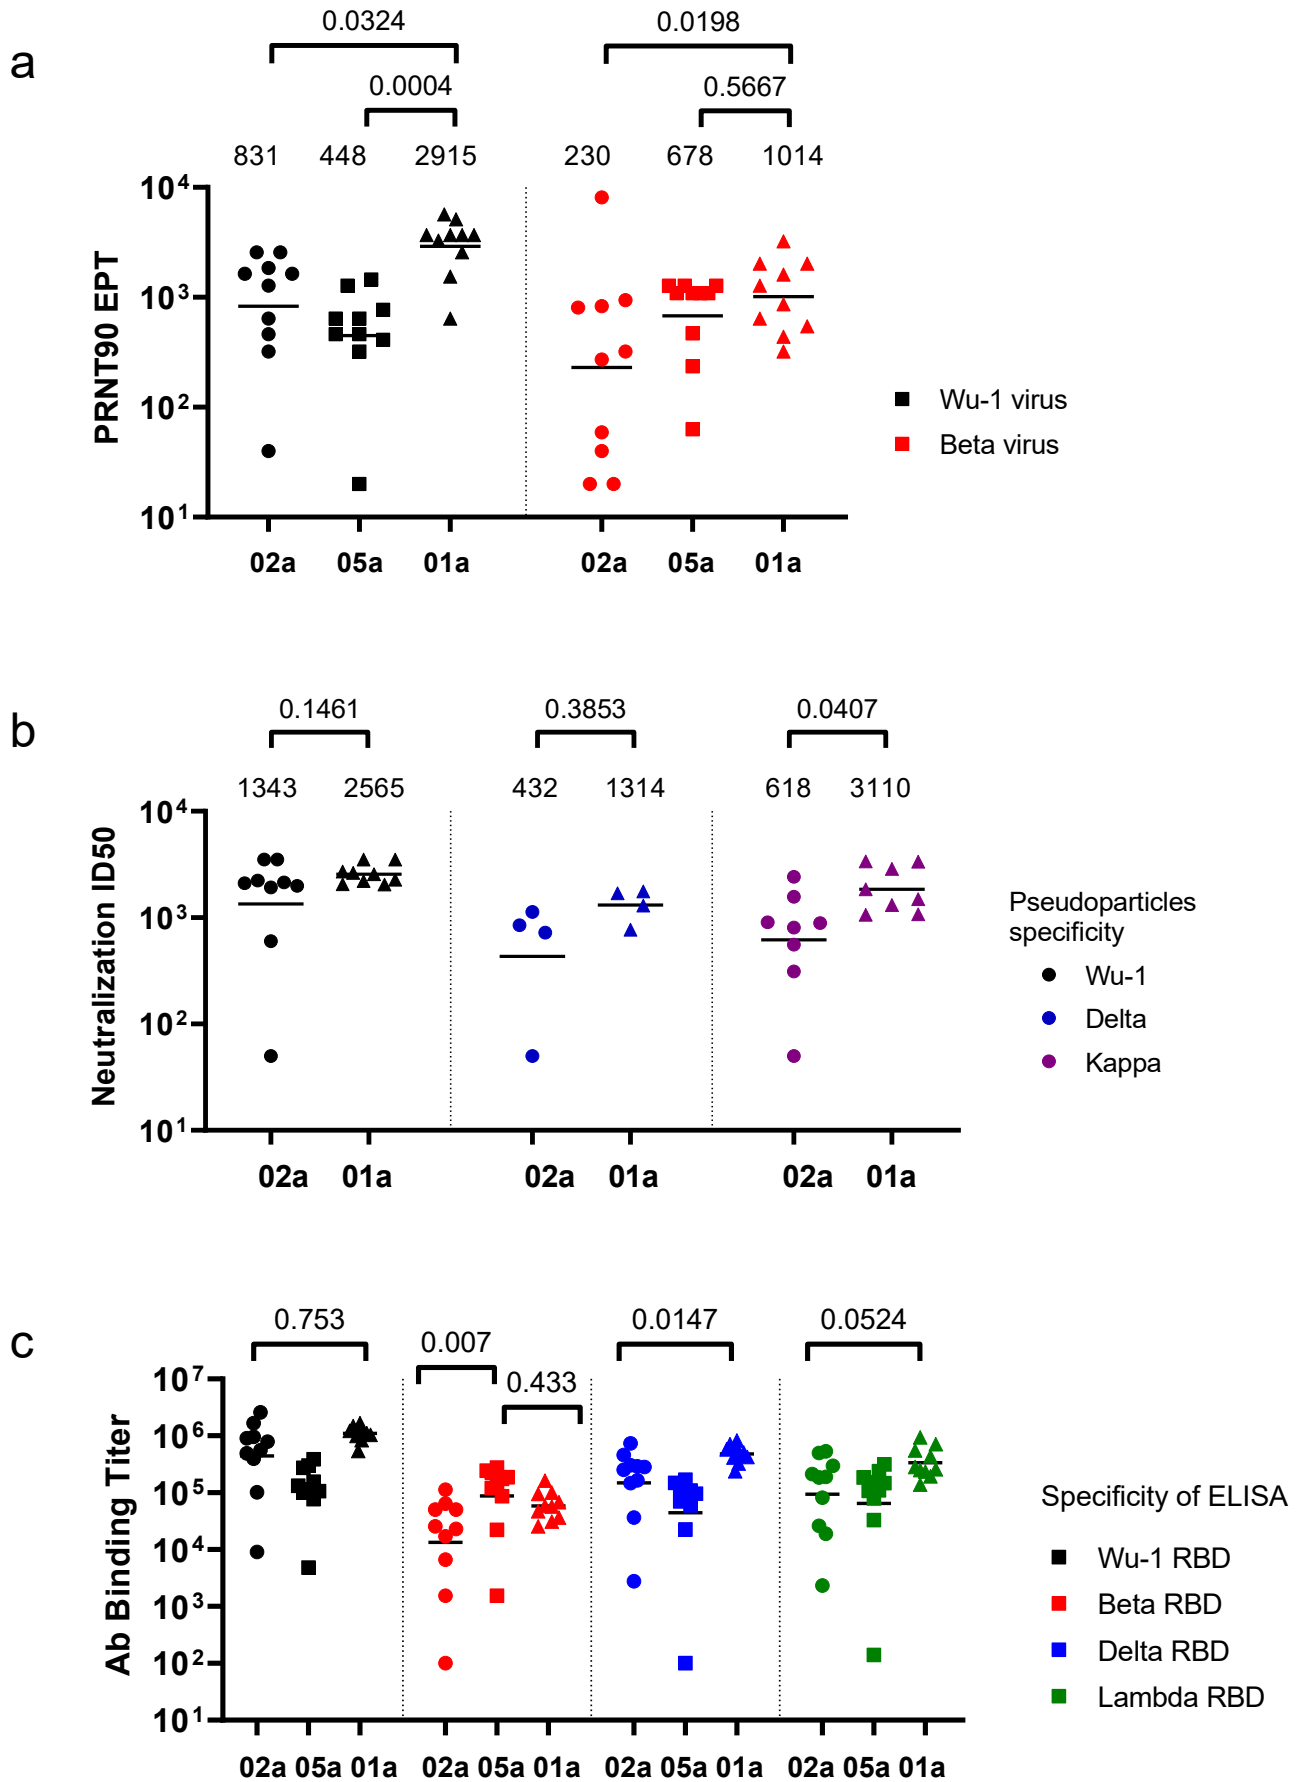

Source: https://www.biorxiv.org/content/10.1101/2021.09.28.462109v1.full.pdf
