# Supplementary material for: Use of eVLP-based vaccine candidates to broaden immunity against SARS-CoV-2 variants
Source: bioRxiv or medRxiv preprint supplement (doi:10.1101/2021.09.28.462109), 2021-09-29
Supplement: Supplementary file [file media-1.pdf]

**Supplementary Table S1: Source of recombinant protein and S protein sequences used in the production of eVLPs**

| <b>Recombinant protein</b>     | <b>Manufacturer</b> | <b>Cat#</b>   | <b>Description</b>                                                                                                 |
|--------------------------------|---------------------|---------------|--------------------------------------------------------------------------------------------------------------------|
| SARS-CoV-2 Wu-1 ancestral      | Sinobiological      | 40589-V08B1   | SARS-CoV-2 (2019-nCoV) Spike Protein (S1+S2 ECD, His tag)                                                          |
| SARS-CoV-2 Wu-1 ancestral, RBD | Sinobiological      | 40592-VNAH    | SARS-CoV-2 (2019-nCoV) Spike Protein (RBD)                                                                         |
| SARS-CoV-2 Beta variant RBD    | Sinobiological      | 40592-V08H85  | SARS-CoV-2 (2019-nCoV) Spike RBD (K417N, E484K, N501Y)-His                                                         |
| SARS-CoV-2 Delta variant RBD   | Sinobiological      | 40592-V02H3   | SARS-CoV-2 Spike RBD (L452R, T478K) Protein (Fc Tag)                                                               |
| SARS-CoV-2 Lambda variant RBD  | Sinobiological      | 40589-V08B23  | SARS-CoV-2 Spike S1+S2 (G75V, T76I, R246N, (247, 253) deletion, L452Q, F490S, D614G, T859N) Protein (ECD, His Tag) |
| SARS-CoV-2 Wu-1 S2 Subunit     | Ray Biotech         | 230-01103-100 | SARS-CoV-2 Spike Protein, S2                                                                                       |
| SARS-CoV-1 S1+S2               | Sinobiological      | 40634-V08B    | SARS-CoV Spike S1+S2 ECD-His (S577A, Isolate Tor2)                                                                 |
| MERS-CoV S1+S2                 | Sinobiological      | 40069-V08B    | MERS-CoV Spike Protein (S1+S2 ECD, aa 1-1297, His Tag)                                                             |

  

| <b>Genotype of S protein sequence</b> | <b>Source</b> | <b>Accession number</b> |
|---------------------------------------|---------------|-------------------------|
| Wu-1 ancestral                        | Genbank       | MN908947                |
| Beta variant isolate                  | GISEAD        | EPI_ISL_3911433         |
| Delta variant isolate                 | GISEAD        | EPI_ISL_2356230         |
| Lambda variant isolate                | GISEAD        | EPI_ISL_3368406         |
| Kappa variant isolate                 | GISEAD        | EPI_ISL_1704611         |
| SARS-CoV-1 HKU-39849                  | Genbank       | JN854286.1              |
| MERS-CoV EMC/2012                     | Genbank       | JX869059.2              |
